CORRECTION

# Correction: Rapid Quantification of 3D Collagen Fiber Alignment and Fiber Intersection Correlations with High Sensitivity

Meng Sun, Alexander B. Bloom, Muhammad H. Zaman

In the version of this article initially published, the authors acknowledged the research support from the National Institutes of Health (U01-CA177799) and the National Science Foundation (DMR-1206335) for this work. The authors would like to also acknowledge the research support from the National Institutes of Health (P01HL120839).

## Reference

1. Sun M, Bloom AB, Zaman MH (2015) Rapid Quantification of 3D Collagen Fiber Alignment and Fiber Intersection Correlations with High Sensitivity. PLoS ONE 10(7): e0131814. doi:[10.1371/journal.pone.0131814](https://doi.org/10.1371/journal.pone.0131814) PMID: [26158674](https://pubmed.ncbi.nlm.nih.gov/26158674/)

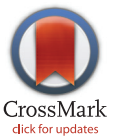

## OPEN ACCESS

**Citation:** Sun M, Bloom AB, Zaman MH (2016) Correction: Rapid Quantification of 3D Collagen Fiber Alignment and Fiber Intersection Correlations with High Sensitivity. PLoS ONE 11(6): e0157379. doi:[10.1371/journal.pone.0157379](https://doi.org/10.1371/journal.pone.0157379)

**Published:** June 7, 2016

**Copyright:** © 2016 Sun et al. This is an open access article distributed under the terms of the [Creative Commons Attribution License](https://creativecommons.org/licenses/by/4.0/), which permits unrestricted use, distribution, and reproduction in any medium, provided the original author and source are credited.
